# Supplementary material for: Nine Decades of Salinity Observations in the San Francisco Bay and Delta: Modeling and Trend Evaluations
Source: Atypon-hosted journal article supplement (doi:10.1061/(asce)wr.1943-5452.0000617), 2015-12-18
Supplement: supplemental_data_wr.1943-5452.0000617_hutton1.pdf [file supplemental_data_wr.1943-5452.0000617_hutton1.pdf]

**ASCE Journal of Water Resources Planning and Management**  
**Nine Decades of Salinity Observations in the San Francisco Bay and Delta:  
Modeling and Trend Evaluations**

Paul H. Hutton, John S. Rath, Limin Chen, Michael J. Unga, and Sujoy B. Roy

**DOI:** 10.1061/(ASCE)WR.1943-5452.0000617

**Supplemental Data**

The supplemental data contains the following:

Figure S1. X2 Position by Month on the San Joaquin River Branch (1922-2012) Grouped by Water Year Classification

Table S1. DWR Document Sources

Table S2. Bulletin 23 Summary of Data Used

Table S3. CDEC Summary of Data Used

Table S4. Trend Analysis on X2 for the San Joaquin River Branch over 1922-1967, 1968-2012, and 1922-2012

Table S5. X2 on San Joaquin River Branch Wilcoxon Rank Sum Test Results (Comparison of 1968–2012 Values Against 1922–1967 Values)

Appendix A: Statistical Analysis Methodology

Electronic data files of salinity and interpolated X2 value (*Microsoft Excel* files:

Supplemental\_Data\_WR.1943-5452.0000617\_Hutton2 and Supplemental\_Data\_WR.1943-5452.0000617\_Hutton3)

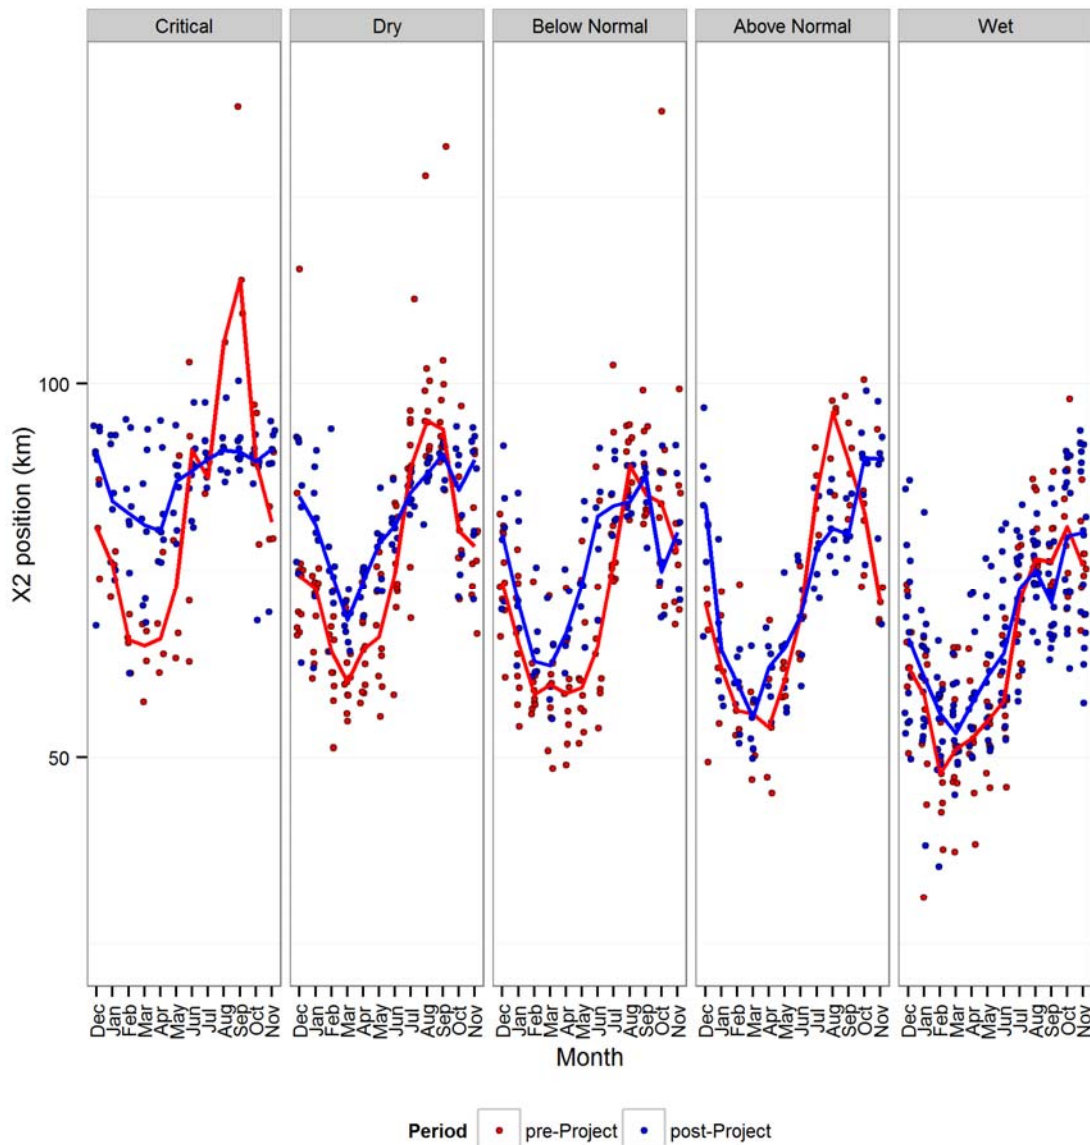

**Figure S1.** Average monthly X2 position is shown by water year class on the San Joaquin River branch under pre-project (Water Years 1922-1967) and post-project (Water Years 1968-2012) conditions, with lines connecting the seasonal medians. Symbols show individual year values (red = pre-Project; blue = post-Project), with lines connecting the seasonal medians. In all but wet years, post-project X2 position tends to be further downstream (i.e. lower) in summer months and further upstream (i.e. higher) in other months. X2 position in October and November is generally more closely associated with the previous water year; thus the x-axis spans the months December through November.

**Table S1. DPW or DWR Bulletin Site Information**

| Report              | Years      |
|---------------------|------------|
| DPW/DWR Bulletin 23 | 1929–1961  |
| DPW Bulletin 27     | 1921–1931  |
| DWR Bulletin 65     | 1962       |
| DWR Bulletin 130    | 1963– 1971 |

**References:**

Department of Public Works, Division of Water Resources (1930 to 1955) Bulletin 23 Report of the Sacramento–San Joaquin Water Supervisor For the Period 1924–1954.

Department of Public Works, Division of Water Resources (1931) Bulletin 27 Variation and Control of Salinity in the Sacramento–San Joaquin Delta and Upper San Francisco Bay.

Department of Water Resources (DWR) (1956 to 1962) Bulletin 23 Report of the Sacramento–San Joaquin Water Supervisor For 1955–1961.

Department of Water Resources (DWR) (1957) Joint Hydrology Study: Sacramento River and Sacramento–San Joaquin River Delta, Division of Planning, July.

Department of Water Resources (DWR) (1962) Bulletin 65 Hydrologic Data 1962.

Department of Water Resources (DWR) (1963 to 1971) Bulletin 130 Hydrologic Data 1963–1971.

**SUPPLEMENTAL DATA**

**Table S2. Bulletin 23 Data Summary of Data Used**

| Station                          | Code | Start     | End        | Number of Grab Sample Observations | Distance from Golden Gate (km) |
|----------------------------------|------|-----------|------------|------------------------------------|--------------------------------|
| <i>Suisun and San Pablo Bays</i> |      |           |            |                                    |                                |
| Point Orient                     | PTO  | 2/10/1926 | 8/30/1957  | 2,427                              | 19.8                           |
| Point Davis                      | PTD  | 2/6/1926  | 8/14/1957  | 1,907                              | 40.6                           |
| Crockett                         | CRK  | 9/26/1946 | 6/30/1971  | 1,729                              | 44.6                           |
| Benicia                          | BEN  | 1/15/1943 | 6/30/1963  | 1,616                              | 52.3                           |
| Martinez                         | MRZ  | 1/2/1946  | 6/30/1971  | 1,773                              | 52.6                           |
| Bulls Head Point                 | BHP  | 2/2/1926  | 7/14/1941  | 1,325                              | 54.7                           |
| West Suisun                      | WSN  | 9/2/1946  | 6/30/1963  | 1,924                              | 59.5                           |
| Bay Point                        | BPT  | 2/2/1926  | 10/22/1944 | 922                                | 64.2                           |
| Port Chicago                     | PCT  | 9/2/1946  | 6/10/1971  | 2,385                              | 66                             |
| O and A Ferry                    | OAF  | 6/2/1920  | 3/30/1957  | 2,904                              | 74.8                           |
| Pittsburg <sup>1</sup>           | PTS  | 1/6/1942  | 5/6/1971   | 1,541                              | 77.2                           |
| <i>Lower Sacramento River</i>    |      |           |            |                                    |                                |
| Collinsville                     | CLL  | 6/2/1920  | 9/30/1969  | 3,564                              | 81.8                           |
| Emmaton                          | EMM  | 6/4/1920  | 6/30/1971  | 2,067                              | 92.9                           |
| Threemile Slough Bridge          | TSB  | 9/4/1926  | 8/30/1969  | 2,377                              | 96.6                           |
| Rio Vista                        | RVB  | 8/4/1920  | 5/26/1971  | 3,068                              | 102.2                          |
| Isleton Bridge                   | ITB  | 7/2/1924  | 6/26/1971  | 2,008                              | 110.6                          |
| Walnut Grove                     | WNG  | 8/14/1920 | 10/30/1939 | 250                                | 124.6                          |
| <i>Lower San Joaquin River</i>   |      |           |            |                                    |                                |
| Antioch                          | ANH  | 6/14/1920 | 6/26/1971  | 4,532                              | 88.4                           |
| Antioch Bridge                   | ANB  | 10/2/1956 | 5/22/1971  | 804                                | 93.7                           |
| Jersey Island                    | JER  | 6/2/1920  | 6/18/1971  | 1,376                              | 98.8                           |
| False River                      | FRV  | 4/10/1965 | 6/30/1971  | 277                                | 101.2                          |
| Oulton Point                     | OPT  | 9/2/1952  | 6/26/1963  | 779                                | 108.1                          |
| San Andreas Landing              | SAL  | 9/2/1952  | 6/2/1971   | 1,339                              | 113.1                          |
| Webb Pump                        | WBP  | 7/28/1920 | 10/18/1952 | 1,151                              | 115.9                          |
| Medford Island Pump              | MIP  | 7/18/1924 | 11/6/1925  | 51                                 | 128.6                          |
| Kings Island Pump                | KIP  | 6/18/1931 | 10/26/1939 | 94                                 | 135.5                          |
| Stockton Country Club            | SCC  | 8/18/1926 | 11/6/1934  | 184                                | 146.1                          |
| Stockton                         | SCT  | 9/2/1948  | 7/30/1952  | 250                                | 152.6                          |

<sup>1</sup> Anomalies found during the tidal adjustment of Bulletin 23 Pittsburg data prevented it from being used in the calculation of isohaline positions

**SUPPLEMENTAL DATA**

**Table S3. CDEC Summary of Data Used**

| Station                            | DWR Distance from Golden Gate (km) | RKI     | Agency | Source   | Data Type and Units | Frequency | Period of Record  |
|------------------------------------|------------------------------------|---------|--------|----------|---------------------|-----------|-------------------|
| <i>Suisun &amp; San Pablo Bays</i> |                                    |         |        |          |                     |           |                   |
| Martinez                           | 54/55 <sup>2</sup>                 | RSAC054 | DWR    | CDEC     | EC (uS/cm)          | Hourly    | 06/1994 – 07/2012 |
|                                    |                                    |         | DWR    | CDEC     | EC (uS/cm)          | Daily     | 01/2006- 01/2012  |
|                                    |                                    |         | USBR   | USBR-CVO | EC (uS/cm)          | Daily     | 01/1965 – 01/1996 |
|                                    |                                    |         | USBR   | STORET   | EC (uS/cm)          | Daily     | 10/1967- 04/1992  |
| Port Chicago                       | 64                                 | RSAC064 | USBR   | CDEC     | EC (uS/cm)          | Daily     | 01/1999 – 01/2012 |
|                                    |                                    |         | USBR   | CDEC     | EC (uS/cm)          | Hourly    | 12/1996 – 07/2012 |
|                                    |                                    |         | USBR   | USBR-CVO | EC (uS/cm)          | Daily     | 01/1966 – 01/1998 |
|                                    |                                    |         | USBR   | USBR-CVO | EC (uS/cm)          | Hourly    | 04/1996 – 05/2005 |
|                                    |                                    |         | USBR   | STORET   | EC (uS/cm)          | Daily     | 10/1967- 04/1992  |
| Mallard Island                     | 75                                 | RSAC075 | DWR    | CDEC     | EC (uS/cm)          | Daily     | 01/1995 – 07/2012 |
|                                    |                                    |         | DWR    | CDEC     | EC (uS/cm)          | Hourly    | 12/1983 – 07/2012 |
|                                    |                                    |         | DWR    | DWR-ESO  | EC (uS/cm)          | Event     | 09/1982 – 10/1985 |
|                                    |                                    |         | DWR    | DWR-ESO  | EC (uS/cm)          | Hourly    | 01/1984 – 09/2002 |
|                                    |                                    |         | DWR    | STORET   | EC (uS/cm)          | Daily     | 1/1981 – 12/1987  |
| Chippis Island                     | 75                                 | RSAC075 | DWR    | STORET   | EC (uS/cm)          | Daily     | 05/1976 – 09/1992 |

<sup>2</sup> The stations named Martinez are in slightly different locations for the USBR and CDEC data sources. The CDEC station is located at RKI RSAC054. The USBR station is at the Shell refinery pier, about 900 meters upstream of the CDEC station (Eli Ateljevich, personal communication). We treat the data as coming from one station for calculations not explicitly involving distance from Golden Gate (e.g., data cleaning and filling), but calculation of isohaline positions uses the distance corresponding to the relevant station location.

**SUPPLEMENTAL DATA**

**Table (continued) CDEC Summary of Data Used**

| <b>Station</b>                | <b>DWR Distance<br/>from Golden Gate (km)</b> | <b>RKI</b> | <b>Agency</b> | <b>Source</b> | <b>Data Type<br/>and Units</b> | <b>Frequency</b> | <b>Period of Record</b> |
|-------------------------------|-----------------------------------------------|------------|---------------|---------------|--------------------------------|------------------|-------------------------|
| <i>Lower Sacramento River</i> |                                               |            |               |               |                                |                  |                         |
| Collinsville                  | 81                                            | RSAC081    | USBR          | CDEC          | EC (uS/cm)                     | Daily            | 01/1999 – 07/2012       |
|                               |                                               |            | USBR          | CDEC          | EC (uS/cm)                     | Hourly           | 03/1988 – 07/2012       |
|                               |                                               |            | USBR          | USBR-CVO      | EC (uS/cm)                     | Daily            | 01/1966 – 01/1998       |
|                               |                                               |            | USBR          | USBR-CVO      | EC (uS/cm)                     | Hourly           | 04/1996 – 05/2005       |
|                               |                                               |            | USBR          | STORET        | EC (uS/cm)                     | Daily            | 10/1967 – 11/1992       |
| Emmaton                       | 92                                            | RSAC092    | USBR          | CDEC          | EC (uS/cm)                     | Hourly           | 01/1988 – 07/2012       |
|                               |                                               |            | DWR           | DWR-BDO       | EC (uS/cm)                     | 15MIN            | 07/1988 – 02/2000       |
|                               |                                               |            | USBR          | USBR-CVO      | EC (uS/cm)                     | Daily            | 01/1964 – 01/1996       |
|                               |                                               |            | USBR          | USBR-CVO      | EC (uS/cm)                     | Hourly           | 04/1996 – 05/2005       |
|                               |                                               |            | USBR          | STORET        | EC (uS/cm)                     | Daily            | 10/1967 – 11/1992       |
| Rio Vista                     | 101                                           | RSAC101    | USBR          | CDEC          | EC (uS/cm)                     | Daily            | 08/1999 – 07/2012       |
|                               |                                               |            | DWR           | CDEC          | EC (uS/cm)                     | Daily            | 12/1995 – 10/2003       |
|                               |                                               |            | DWR           | CDEC          | EC (uS/cm)                     | Hourly           | 01/1984 – 07/2012       |
|                               |                                               |            | DWR           | DWR-ESO       | EC (uS/cm)                     | Hourly           | 05/1983- 09/2002        |
|                               |                                               |            | USBR          | USBR-CVO      | EC (uS/cm)                     | Daily            | 01/1966 – 01/1998       |
|                               |                                               |            | USBR          | USBR-CVO      | EC (uS/cm)                     | Hourly           | 04/1996 – 05/2005       |
|                               |                                               |            | USBR          | STORET        | EC (uS/cm)                     | Daily            | 10/1967 – 11/1992       |

**SUPPLEMENTAL DATA**

**Table (continued) CDEC Summary of Data Used**

| Station                                | DWR Distance from Golden Gate (km) | RKI      | Agency | Source   | Data Type and Units | Frequency | Period of Record  |
|----------------------------------------|------------------------------------|----------|--------|----------|---------------------|-----------|-------------------|
| <i>Lower San Joaquin River</i>         |                                    |          |        |          |                     |           |                   |
| Pittsburg                              | 77                                 | RSAC077  | USBR   | CDEC     | EC (uS/cm)          | Daily     | 01/1999 – 07/2012 |
|                                        |                                    |          | USBR   | CDEC     | EC (uS/cm)          | Hourly    | 03/1988 – 07/2012 |
|                                        |                                    |          | USBR   | USBR-CVO | EC (uS/cm)          | Hourly    | 04/1996 – 05/2005 |
|                                        |                                    |          | USBR   | USBR-CVO | EC (uS/cm)          | Daily     | 01/1965 – 01/1998 |
|                                        |                                    |          | USBR   | STORET   | EC (uS/cm)          | Daily     | 10/1967 – 11/1992 |
| Antioch                                | 85.75                              | RSAN007  | USBR   | CDEC     | EC (uS/cm)          | Daily     | 08/1999 – 07/2012 |
|                                        |                                    |          | DWR    | CDEC     | EC (uS/cm)          | Daily     | 01/1995 – 07/2012 |
|                                        |                                    |          | DWR    | CDEC     | EC (uS/cm)          | Hourly    | 02/1984 – 07/2012 |
|                                        |                                    |          | DWR    | DWR-ESO  | EC (uS/cm)          | Hourly    | 05/1983- 09/2002  |
|                                        |                                    |          | USBR   | STORET   | EC (uS/cm)          | Daily     | 10/1967 – 11/1992 |
| Blind Point                            | 92.85                              | RSAN014  | DWR    | CDEC     | EC (uS/cm)          | Daily     | 12/1995 – 08/1999 |
|                                        |                                    |          | DWR    | CDEC     | EC (uS/cm)          | Daily     | 03/2010 – 07/2012 |
|                                        |                                    |          | DWR    | CDEC     | EC (uS/cm)          | Hourly    | 01/1984 – 09/1999 |
|                                        |                                    |          | DWR    | DWR-CD   | EC (uS/cm)          | Event     | 09/1982 – 09/1997 |
|                                        |                                    |          | DWR    | STORET   | EC (uS/cm)          | Daily     | 08/1971 – 10/1979 |
| Jersey Point                           | 95.75                              | RSAN018  | USBR   | CDEC     | EC (uS/cm)          | Daily     | 08/1999 – 07/2012 |
|                                        |                                    |          | USBR   | CDEC     | EC (uS/cm)          | Hourly    | 03/1988 – 07/2012 |
|                                        |                                    |          | USBR   | USBR-CVO | EC (uS/cm)          | Daily     | 01/1964 – 01/1998 |
|                                        |                                    |          | USBR   | USBR-CVO | EC (uS/cm)          | Hourly    | 04/1996 – 05/2005 |
|                                        |                                    |          | USBR   | STORET   | EC (uS/cm)          | Daily     | 10/1967 – 11/1992 |
| Three Mile Slough at San Joaquin River | 100.4                              | SLTRM004 | USGS   | CDEC     | EC (uS/cm)          | Daily     | 06/2008 – 07/2012 |
|                                        |                                    |          | DWR    | DWR-CD   | EC (uS/cm)          | 15MIN     | 10/1987 – 02/1998 |
| San Andreas Landing                    | 109.2                              | RSAN032  | USBR   | CDEC     | EC (uS/cm)          | Daily     | 08/1999 – 07/2012 |
|                                        |                                    |          | USBR   | CDEC     | EC (uS/cm)          | Hourly    | 03/1988 – 07/2012 |
|                                        |                                    |          | USBR   | USBR-CVO | EC (uS/cm)          | Daily     | 01/1964 – 01/1998 |
|                                        |                                    |          | USBR   | USBR-CVO | EC (uS/cm)          | Hourly    | 04/1996 – 05/2005 |
|                                        |                                    |          | USBR   | STORET   | EC (uS/cm)          | Daily     | 10/1967 – 05/1988 |

**SUPPLEMENTAL DATA**

**Table S4. San Joaquin X2 Mann-Kendall Test Results, WY**

| Years     | Month | Sample Size | Sen's Trend Slope Median | Test Decision |
|-----------|-------|-------------|--------------------------|---------------|
| 1922–1967 | Jan   | 39          | -0.1                     | ↔             |
|           | Feb   | 39          | -0.03                    | ↔             |
|           | Mar   | 40          | 0.09                     | ↔             |
|           | Apr   | 39          | 0.19                     | ↔             |
|           | May   | 39          | 0.08                     | ↔             |
|           | Jun   | 40          | 0.01                     | ↔             |
|           | Jul   | 39          | 0.09                     | ↔             |
|           | Aug   | 37          | -0.19                    | ↔             |
|           | Sep   | 39          | -0.51                    | ↓             |
|           | Oct   | 41          | -0.36                    | ↓             |
|           | Nov   | 40          | -0.27                    | ↓             |
|           | Dec   | 40          | -0.21                    | ↓             |
| 1968–2012 | Jan   | 44          | 0.25                     | ↔             |
|           | Feb   | 43          | 0.10                     | ↔             |
|           | Mar   | 43          | 0.02                     | ↔             |
|           | Apr   | 43          | 0.02                     | ↔             |
|           | May   | 45          | -0.20                    | ↔             |
|           | Jun   | 45          | -0.11                    | ↔             |
|           | Jul   | 45          | -0.12                    | ↔             |
|           | Aug   | 45          | 0.05                     | ↔             |
|           | Sep   | 45          | 0.22                     | ↑             |
|           | Oct   | 45          | 0.25                     | ↑             |
|           | Nov   | 45          | 0.40                     | ↑             |
|           | Dec   | 45          | 0.42                     | ↑             |
| 1922–2012 | Jan   | 83          | 0.11                     | ↑             |
|           | Feb   | 82          | 0.09                     | ↑             |
|           | Mar   | 83          | 0.08                     | ↑             |
|           | Apr   | 82          | 0.15                     | ↑             |
|           | May   | 84          | 0.13                     | ↑             |
|           | Jun   | 85          | 0.10                     | ↔             |
|           | Jul   | 84          | -0.02                    | ↔             |
|           | Aug   | 82          | -0.14                    | ↓             |
|           | Sep   | 84          | -0.13                    | ↓             |
|           | Oct   | 86          | -0.01                    | ↔             |
|           | Nov   | 85          | 0.11                     | ↑             |
|           | Dec   | 85          | 0.15                     | ↑             |



**SUPPLEMENTAL DATA**

**Table S5. San Joaquin X2 Wilcoxon Rank Sum Test Results (comparison of 1968–2012 values against 1922–1967 values)**

| Month | Year Type |          |              |              |          |
|-------|-----------|----------|--------------|--------------|----------|
|       | Critical  | Dry      | Below Normal | Above Normal | Wet      |
| Jan   | 8.9 (↔)   | 10.1 (↑) | 7.5 (↔)      | -1.0 (↔)     | 4.1 (↔)  |
| Feb   | 17.6 (↑)  | 10.8 (↑) | 4.4 (↑)      | 0.8 (↔)      | 5.7 (↑)  |
| Mar   | 17.3 (↑)  | 7.6 (↑)  | 3.1 (↔)      | 0.9 (↔)      | 1.7 (↔)  |
| Apr   | 14.9 (↑)  | 9.2 (↑)  | 9.1 (↑)      | 7.2 (↔)      | 4.5 (↔)  |
| May   | 13.2 (↔)  | 10.8 (↑) | 13.3 (↑)     | 2.4 (↔)      | 6.3 (↑)  |
| Jun   | -1.7 (↔)  | 5.5 (↔)  | 16.4 (↑)     | 0.7 (↔)      | 6.8 (↑)  |
| Jul   | 2.5 (↔)   | -4.4 (↓) | 6.0 (↔)      | -7.9 (↓)     | 2.3 (↔)  |
| Aug   | -14.4 (↔) | -7.9 (↓) | -3.6 (↔)     | -12.1 (↓)    | -3.5 (↓) |
| Sep   | -22.9 (↓) | -4.1 (↔) | 0.9 (↔)      | -8.6 (↓)     | -6.0 (↓) |
| Oct   | -2.8 (↔)  | 2.7 (↔)  | -7.4 (↔)     | 6.7 (↔)      | -2.2 (↔) |
| Nov   | 9.9 (↔)   | 8.6 (↔)  | 1.8 (↔)      | 18.0 (↔)     | 3.6 (↔)  |
| Dec   | 9.7 (↔)   | 9.0 (↔)  | 4.8 (↔)      | 14.7 (↑)     | 2.7 (↔)  |

## Appendix A. Statistical Procedures Used

### MANN-KENDALL TEST FOR SEN SLOPE SIGNIFICANCE

The Mann-Kendall test for trend is insensitive to the presence or absence of seasonality. It is a nonparametric test since it does not assume any type of data distribution. Nonetheless, two forms of the test are provided: one that ignores data seasonality (even if it is present) and one that considers data seasonality. In either test, the null hypothesis ( $H_0$ ) assumes that the trend is zero, and the alternate hypothesis ( $H_a$ ) is that the trend is either upward or downward. Details of the Mann-Kendall trend test for slope and the seasonal Kendall trend test are shown below.

In general, the Mann-Kendall trend test considering seasonality indicates a larger range for an allowable estimate of trend when seasonality is actually present than the range indicated by the test performed ignoring seasonality.

In the Mann-Kendall trend analysis and Kendall seasonal analysis, the “Sen” slopes are first calculated, ranked, and then assigned the indicator value of +1, -1, or 0 according to the sign of the calculated differences of all possible time-ranked pairs. The Mann-Kendall  $S$  statistic is then computed as the number of positive differences minus the number of negative differences. The Kendall test statistic  $T_s$  is computed using the  $S$  value and its variance  $VAR(S)$ , such that a positive  $T_s$  value means an upward trend and a negative  $T_s$  value means a negative trend. Significance of the Kendall test statistic  $T_s$  is determined by comparing it against the cumulative normal distribution function  $Z_{1-\alpha}$ . The median value of the Sen slope is calculated with and without seasonality. Since slopes are calculated over all possible time intervals, it is possible that the test indicates a “non-zero” trend, yet the median slope value equal zero.

**MANN-KENDALL TREND TEST FOR SLOPE**

|                                                                                                                                                                                                        |                                                                                                                                                                                                                                                                                                                                                                                                                                                                                                                                                                                                                                                                                                                                                     |
|--------------------------------------------------------------------------------------------------------------------------------------------------------------------------------------------------------|-----------------------------------------------------------------------------------------------------------------------------------------------------------------------------------------------------------------------------------------------------------------------------------------------------------------------------------------------------------------------------------------------------------------------------------------------------------------------------------------------------------------------------------------------------------------------------------------------------------------------------------------------------------------------------------------------------------------------------------------------------|
| <p><b>Mann-Kendall Trend Test for Sen Slope Significance</b> – for number of data as small as 10, unless there are many tied (e.g., equal, NDs are treated as tied) values (Gilbert, 1987; p. 208)</p> |                                                                                                                                                                                                                                                                                                                                                                                                                                                                                                                                                                                                                                                                                                                                                     |
| <p>Indicator Function<br/><math>\text{sgn}(x_j - x_k)</math></p>                                                                                                                                       | $= 1 \text{ if } (x_j - x_k) > 0$ $= 0 \text{ if } (x_j - x_k) = 0$ $= -1 \text{ if } (x_j - x_k) < 0$ <p>where <math>x_1, x_2, \dots, x_n</math> are the time ordered data (<math>n</math> is the total of data).</p>                                                                                                                                                                                                                                                                                                                                                                                                                                                                                                                              |
| <p>Mann-Kendall Statistic, <math>S</math></p>                                                                                                                                                          | $= \sum_{k=1}^{n-1} \sum_{j=k+1}^n \text{sgn}(x_j - x_k)$                                                                                                                                                                                                                                                                                                                                                                                                                                                                                                                                                                                                                                                                                           |
| <p>Variance of <math>S</math>: <math>\text{VAR}(S)</math></p>                                                                                                                                          | $= \frac{1}{18} [n(n-1)(2n+5)$ $- \sum_{p=1}^g t_p(t_p-1)(2t_p+5)$ $- \sum_{q=1}^h u_q(u_q-1)(2u_q+5)]$ $+ \frac{\sum_{p=1}^{g_i} t_{ip}(t_{ip}-1)(t_{ip}-2) \sum_{q=1}^{h_i} u_{iq}(u_{iq}-1)(u_{iq}-2)}{9n_i(n_i-1)(n_i-2)}$ $+ \frac{\sum_{p=1}^{g_i} t_{ip}(t_{ip}-1) \sum_{q=1}^{h_i} u_{iq}(u_{iq}-1)}{2n_i(n_i-1)}$ <p>where <math>g</math> is the number of tied groups (equal-valued) in the data set; <math>t_p</math> is the number of tied data in the <math>p</math>-th group; <math>h</math> is the number of sampling times (or time periods) in the data set that contain multiple data; <math>u_q</math> is the number of multiple data in the <math>q</math>-th time period; and <math>n</math> is the number of data values.</p> |
| <p>Test Statistic,<br/><math>T_s</math></p>                                                                                                                                                            | <p>The Kendal statistic <math>T_s</math> is defined as</p> $= \frac{S-1}{[\text{VAR}(S)]^{1/2}} \text{ if } S > 0$ $= 0 \quad \text{if } S = 0$ $= \frac{S+1}{[\text{VAR}(S)]^{1/2}} \text{ if } S < 0$ <p><math>T_s</math></p> <p>where a positive <math>T_s</math> value means an upward trend and a negative <math>T_s</math> value means a negative trend.</p>                                                                                                                                                                                                                                                                                                                                                                                  |

**SUPPLEMENTAL DATA**

|                                                                                                                                                                                                                                           |                                                                                                                                                                                                                                                                                                                                                                                                                                                                                                                                                                                                                                                                                                                                                        |
|-------------------------------------------------------------------------------------------------------------------------------------------------------------------------------------------------------------------------------------------|--------------------------------------------------------------------------------------------------------------------------------------------------------------------------------------------------------------------------------------------------------------------------------------------------------------------------------------------------------------------------------------------------------------------------------------------------------------------------------------------------------------------------------------------------------------------------------------------------------------------------------------------------------------------------------------------------------------------------------------------------------|
| <p>Hypothesis Test:<br/> <math>H_0</math> = no trend<br/> <math>H_{a1}</math> = upward trend present<br/> <math>H_{a2}</math> = downward trend present</p> <p>This is a one-sided test at the <math>\alpha</math> significance level.</p> | <p>The null hypothesis <math>H_0</math> assumes that there is no trend in the data as a function of time. However, we will check for two alternative hypotheses. These are determined as follows:</p> <p>A1) Reject the null hypothesis <math>H_0</math> and accept the alternative hypothesis <math>H_{a1}</math> for an upward trend</p> $\text{if } T_s > 0 \text{ and } T_s > Z_{1-\alpha};$ <p>A2) Reject the null hypothesis <math>H_0</math> and accept the alternative hypothesis <math>H_{a2}</math> of a downward trend</p> $\text{if } T_s < 0 \text{ and }  T_s  > Z_{1-\alpha}.$ <p>The term <math>Z_{1-\alpha}</math> is the cumulative normal distribution function, which can be obtained from Table A1 in Gilbert (1987; p. 254).</p> |
| <p>Sen's Slope Estimator: Q</p>                                                                                                                                                                                                           | <p>Slopes are initially calculated over each possible time period:</p> $Q_{lk} = \frac{X_l - X_k}{t_l - t_k}, \quad l > k$ <p>where <math>X_l</math> and <math>X_k</math> are the concentrations measured at time <math>t_l</math> and <math>t_k</math>. These <math>Q_{lk}</math> individual slopes are ranked, and the median value is used to represent the slope estimator of trend (Gilbert, 1987; p. 227).</p>                                                                                                                                                                                                                                                                                                                                   |

**WILCOXON RANK SUM TEST**

Assumptions in the Wilcoxon Rank-Sum test are generally more reasonable than those in the Student t-test. The Wilcoxon Rank-Sum test assumes that: (1) both data sets contain random values from their respective populations, and (2) in addition to independence within each data set, there is mutual independence between the two sample sets. No assumptions are made about data distribution. The null hypothesis is that the two location means are equal, and the alternative hypothesis is that the two location means are different.

|                                                                                                                                                                                                                                                                                                                                                       |                                                                                                                                                                                                                                                                                                                                                                                                                                                                                                                                                                          |
|-------------------------------------------------------------------------------------------------------------------------------------------------------------------------------------------------------------------------------------------------------------------------------------------------------------------------------------------------------|--------------------------------------------------------------------------------------------------------------------------------------------------------------------------------------------------------------------------------------------------------------------------------------------------------------------------------------------------------------------------------------------------------------------------------------------------------------------------------------------------------------------------------------------------------------------------|
| <b>Wilcoxon Rank-Sum Test for Comparison of Means</b> – a one-sided, non-parametric test for comparing the means of two data sets (Gilbert, 1987; p. 247). In this application the two data sets are concentration data from pooled background and a single compliance location.                                                                      |                                                                                                                                                                                                                                                                                                                                                                                                                                                                                                                                                                          |
| Sum of Ranks: $W_A, W_B$                                                                                                                                                                                                                                                                                                                              | First pool all of the data from samples A and B, then rank the values from smallest to largest. Sum all of the ranks associated with samples A and B from the pooled sample set, respectively.                                                                                                                                                                                                                                                                                                                                                                           |
| $n_A, n_B$                                                                                                                                                                                                                                                                                                                                            | Number of observations in samples A and B, respectively.                                                                                                                                                                                                                                                                                                                                                                                                                                                                                                                 |
| Test Statistic: $Z_A$                                                                                                                                                                                                                                                                                                                                 | $Z_A = \frac{[W_A - n_A \frac{(m+1)}{2}]}{\left\{ \frac{n_A n_B}{12} \left[ (m+1) - \frac{\sum_{j=1}^g t_j (t_j^2 - 1)}{m(m-1)} \right] \right\}^{1/2}}$ <p>where <math>m = (n_A + n_B)</math>, <math>g</math> is the number of tied groups, and <math>t_j</math> is the number of tied data in the <math>j</math>-th group.</p>                                                                                                                                                                                                                                         |
| <p>Hypothesis Test:</p> <p><math>H_0</math> = means are the same</p> <p><math>H_{a1}</math> = Compliance location has a higher concentration than the Background.</p> <p><math>H_{a2}</math> = Background location has a higher concentration than the Compliance.</p> <p>This is a one-sided test at the <math>\alpha</math> significance level.</p> | <p>Accept the null hypothesis <math>H_0</math> of equal means<br/>if <math>Abs[Z_A] &lt; Z_{1-\alpha}</math>    <i>accept</i> <math>H_0</math>.</p> <p>Reject the null hypothesis <math>H_0</math> of equal means<br/>if <math>Z_A \geq Z_{1-\alpha}</math>    <i>reject</i> <math>H_0</math> and <i>accept</i> <math>H_{a1}</math>,<br/>if <math>Z_A \leq -Z_{1-\alpha}</math>    <i>reject</i> <math>H_0</math> and <i>accept</i> <math>H_{a2}</math>,</p> <p>where <math>Z_{1-\alpha}</math> is the critical Z value given in Table A1 of Gilbert (1987; p. 254).</p> |

**REFERENCE**

Gilbert, R. 1987. Statistical Methods For Environmental Pollution Monitoring. Van Nostrand Reinhold Co., NY. 320 pp.
